# Supplementary material for: Physiological Oxygen Levels Differentially Regulate Adipokine Production in Abdominal and Femoral Adipocytes from Individuals with Obesity Versus Normal Weight
Source: MDPI journal article supplement (doi:10.3390/cells11223532), 2022-11-08
Supplement: s1 [file s1]

## Supplementary Materials

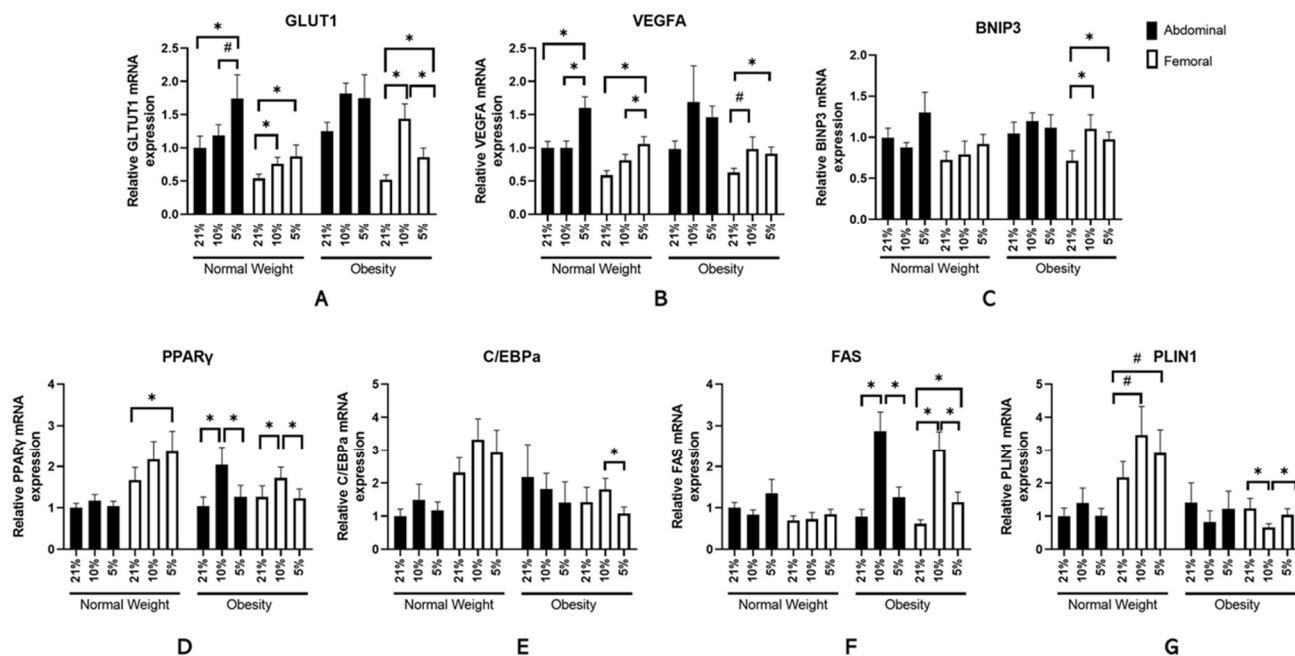

**Figure S1:** Adipocyte differentiation and hypoxia markers gene expression in adipose tissue-derived mesenchymal stem cells following differentiation under different pO<sub>2</sub>s (21% vs. 10% vs. 5% O<sub>2</sub>). Panel A: GLUT1, glucose transporter 1; B: VEGFA, vascular endothelial growth factor A; C: BNIP3, Bcl-2 interacting protein 3; D: PPAR $\gamma$ , peroxisome proliferator-activated receptor  $\gamma$ ; E: C/EBP $\alpha$ , CCAAT-enhancer binding protein  $\alpha$ ; F: FAS, fatty acid synthase; G: PLIN1, Perilipin 1. Data are expressed as mean  $\pm$  SEM. \*  $p < 0.05$ , #  $p < 0.01$
